# Supplementary material
Source: publisher site journal article supplement (http://kjim.org/upload/media/kjim-2020-039-suppl3.pdf)
Supplement: Supplementary file 1 [file kjim-2020-039-suppl3.pdf]

**Supplementary Figure 1.** (A, B) Comparison of the cumulative survival rates based on the age of 75 years. Elderly antineutrophil cytoplasmic antibody-associated vasculitis (AAV) patients (aged  $\geq 75$  years) exhibited the lower cumulative patients' and end-stage renal disease (ESRD)-free survival rates than non-elderly AAV patients (aged  $< 75$  years), similar to the comparative analysis based on the age of 65 years.
